# Supplementary material for: Apoptotic signaling clears engineered Salmonella in an organ-specific manner
Source: eLife. 2023 Dec 6;12:RP89210. doi: 10.7554/eLife.89210 (PMC10699806; doi:10.7554/eLife.89210)
Supplement: Figure 1—figure supplement 1—source data 2. [file elife-89210-fig1-figsupp1-data2.xlsx]

## Sheet: Figure 1-figure supplement 1B
Source Data for Figure 1- figure supplement 1B
Vector control data from Figure 1E
Representative of 3 independent experiments
Graph from one experiment with 3 technical replicates per timepoint per genotype
	% LDH Release
Hours post infection	WT			Nlrc4–/–			Casp1–/–			Gsdmd–/–
1	11.9	4.2	4.3	4.4	5.5	5.6	3.8	4.7	4.6	5.9	4.4	5
2	4.5	3.9	4	6.8	4.9	4.9	5.1	3.1	4.5	3.8	3.8	4.7
3	11.9	7.7	7.1	6.3	5.6	5.7	8.6	6.8	4.7	4.8	6.6	5.5
4	7.7	6.5	5.9	6.1	3.9	4	5.4	19.3	3.7	6.2	4.1	2.6
5	7.2	5.1	5.9	6	6.6	5.8	5.5	6.8	5.9	5.9	5.9	5.5
6	10.1	7.5	6.1	6.8	9.9	6.3	7.6	6.1	6.8	7.4	5.2	5.6
7	9.3	10.7	8.5	8.2	7.7	6.6	9.8	9.2	9	9.2	7.9	8.9
8	15.1	11.6	12.6	10.8	11.4	10.7	11.3	11.6	10.1	10.3	11	11.6
Mean + SD as calculated by Prism 9.5.1
Hours post infection	WT			Nlrc4–/–			Casp1–/–			Gsdmd–/–
	Mean	SD	N	Mean	SD	N	Mean	SD	N	Mean	SD	N
1	6.8	4.41701	3	5.16667	0.665833	3	4.36667	0.493288	3	5.1	0.754983	3
2	4.13333	0.321455	3	5.53333	1.09697	3	4.23333	1.02632	3	4.1	0.519615	3
3	8.9	2.61534	3	5.86667	0.378594	3	6.7	1.95192	3	5.63333	0.907377	3
4	6.7	0.916515	3	4.66667	1.24231	3	9.46667	8.55823	3	4.3	1.80831	3
5	6.06667	1.05987	3	6.13333	0.416333	3	6.06667	0.665833	3	5.76667	0.23094	3
6	7.9	2.02978	3	7.66667	1.95021	3	6.83333	0.750555	3	6.06667	1.17189	3
7	9.5	1.11355	3	7.5	0.818535	3	9.33333	0.416333	3	8.66667	0.680686	3
8	13.1	1.80278	3	10.9667	0.378594	3	11	0.793725	3	10.9667	0.650641	3

## Sheet: Figure 1-figure supplement 1C
Source Data for Figure 1- figure supplement 1C
Results from one independent experiment
3 technical replicates per timepoint per genotype
FliCON	% LDH Release
Hours post infection	WT			Gsdmd–/–			Asc/Gsdmd–/–			Bid/Gsdmd–/–
3	39.7	41.1	42.5	1.8	3.5	2.9	0.1	0.4	3.5	0.5	-0.7	2
6	77.5	66.5	66.8	41.6	37.6	42.1	8.7	13.6	13.2	11.8	9	10.1
8	54.1	59.7	57.7	47.4	45.8	48.2	31.9	30.2	29.2	19.8	18.1	17.7
Mean + SD as calculated by Prism 9.5.1
Hours post infection	WT			Gsdmd–/–			Asc/Gsdmd–/–			Bid/Gsdmd–/–
	Mean	SD	N	Mean	SD	N	Mean	SD	N	Mean	SD	N
3	41.1	1.4	3	2.73333	0.862168	3	1.33333	1.88237	3	0.6	1.35277	3
6	70.2667	6.26605	3	40.4333	2.46644	3	11.8333	2.72091	3	10.3	1.41067	3
8	57.1667	2.83784	3	47.1333	1.22202	3	30.4333	1.36504	3	18.5333	1.11505	3
Vector	% LDH Release
Hours post infection	WT			Gsdmd–/–			Asc/Gsdmd–/–			Bid/Gsdmd–/–
3	3.5	4.5	3.5	4.3	4.1	3.8	3.1	3	5.4	3.4	4	4.4
6	6.6	6.7	7.7	5.2	4.1	5.3	5.7	6.1	5.7	6.6	4.3	4.4
8	20.7	19	20.2	11.3	6.6	9.3	10.3	9	11.3	8.5	7.7	10.2
Mean + SD as calculated by Prism 9.5.1
Hours post infection	WT			Gsdmd–/–			Asc/Gsdmd–/–			Bid/Gsdmd–/–
	Mean	SD	N	Mean	SD	N	Mean	SD	N	Mean	SD	N
3	3.83333	0.57735	3	4.06667	0.251661	3	3.83333	1.35769	3	3.93333	0.503322	3
6	7	0.608276	3	4.86667	0.665833	3	5.83333	0.23094	3	5.1	1.3	3
8	19.9667	0.873689	3	9.06667	2.35867	3	10.2	1.15326	3	8.8	1.27671	3
