# Supplementary material for: Apoptotic signaling clears engineered Salmonella in an organ-specific manner
Source: eLife. 2023 Dec 6;12:RP89210. doi: 10.7554/eLife.89210 (PMC10699806; doi:10.7554/eLife.89210)
Supplement: Figure 1—source data 3. [file elife-89210-fig1-data3.xlsx]

## Sheet: Figure 1E
Source Data for Figure 1E
Representative of 3 independent experiments
Graph from one experiment with 3 technical replicates per timepoint per genotype
	% LDH Release
Hours post infection	WT			Nlrc4–/–			Casp1–/–			Gsdmd–/–
1	3.9	5.8	5.3	5.4	3.5	4.3	4.1	3.8	4.3	4.3	3.6	6.7
2	10.9	9	8.3	4.8	3.1	3.8	5.2	5.6	3.3	3.9	4.7	3.6
3	41.8	39.3	38.3	6.3	5.8	4.8	7.4	7	6.5	8.4	11.1	9.6
4	52.1	55.9	62.5	5.3	3.5	5.5	5.7	3.4	2.8	15.4	19.1	19.3
5	61.8	58	61.5	6.3	5.2	6.5	5.1	5.7	5.3	35.9	33.2	37.7
6	68.6	67	63.1	8.2	9.1	8.7	8.5	7.5	6.5	43	46.6	45.9
7	68.3	61.7	59.8	8.3	7.2	9.1	10.9	15.5	11.2	46.4	47.5	50.7
8	65.1	55.9	64.7	14.6	12.2	12.5	15.8	14.6	15	53.3	51.5	50.2
Mean + SD as calculated by Prism 9.5.1
Hours post infection	WT			Nlrc4–/–			Casp1–/–			Gsdmd–/–
	Mean	SD	N	Mean	SD	N	Mean	SD	N	Mean	SD	N
1	5	0.984886	3	4.4	0.953939	3	4.06667	0.251661	3	4.86667	1.62583	3
2	9.4	1.34536	3	3.9	0.8544	3	4.7	1.22882	3	4.06667	0.568624	3
3	39.8	1.80278	3	5.63333	0.763763	3	6.96667	0.450925	3	9.7	1.35277	3
4	56.8333	5.26245	3	4.76667	1.10151	3	3.96667	1.5308	3	17.9333	2.19621	3
5	60.4333	2.11266	3	6	0.7	3	5.36667	0.305505	3	35.6	2.26495	3
6	66.2333	2.82902	3	8.66667	0.450925	3	7.5	1	3	45.1667	1.90875	3
7	63.2667	4.46132	3	8.2	0.953939	3	12.5333	2.57358	3	48.2	2.23383	3
8	61.9	5.2	3	13.1	1.30767	3	15.1333	0.61101	3	51.6667	1.55671	3
