# Supplementary material for: Apoptotic signaling clears engineered Salmonella in an organ-specific manner
Source: eLife. 2023 Dec 6;12:RP89210. doi: 10.7554/eLife.89210 (PMC10699806; doi:10.7554/eLife.89210)
Supplement: Figure 2—source data 1. [file elife-89210-fig2-data1.xlsx]

## Sheet: Figure 2B
Source Data for Figure 2B
Representative of three (WT, Gsdmd-/-) or two (Nlrc4-/-, Casp1-/-) experiments
N=3-4 mice per genotype per timepoint
* One D1 Nlrc4 mouse was excluded under the "uninfected" criteria-- no colonies on either vector or FliCON plate at harvest
	Competitive index (Vector/FliCON)
Days post infection	WT				Gsdmd–/–				Casp1–/–				Nlrc4–/–
1	0.6163	1.6163	0.71321	1.07424	-0.30173	-0.0997029	-0.21416		-0.364095	0.189632	-0.492844	0.0599979	-0.0313322	0.142185	0.0365168
2	2.78016	1.38451	2.41218		-0.0971255	0.033669	0.148939	0.0842665	0.178503	-0.0666473	-0.288956	-0.170451	0.280443	0.250812	-0.134267	0.324816
Mean + SD from Prism 9.5.1
Days post infection	WT			Gsdmd–/–			Casp1–/–			Nlrc4–/–
	Mean	SD	N	Mean	SD	N	Mean	SD	N	Mean	SD	N
1	1.00501	0.452663	4	-0.205198	0.101311	3	-0.151827	0.328032	4	0.0491231	0.0874426	3
2	2.19228	0.723343	3	0.0424373	0.104318	4	-0.0868878	0.198877	4	0.180451	0.212005	4
Statistics
2-way ANOVA	Tukey's multiple comparisons test	Predicted (LS) mean diff.	95.00% CI of diff.	Below threshold?	Summary	Adjusted P Value
	Day 1
	WT vs. Gsdmd–/–	1.21	0.5048 to 1.916	Yes	***	0.0005
	WT vs. Casp1–/–	1.157	0.5037 to 1.810	Yes	***	0.0004
	WT vs. Nlrc4–/–	0.9559	0.2504 to 1.661	Yes	**	0.0056
	Gsdmd–/– vs. Casp1–/–	-0.05337	-0.7588 to 0.6521	No	ns	0.9966
	Gsdmd–/– vs. Nlrc4–/–	-0.2543	-1.008 to 0.4998	No	ns	0.7839
	Casp1–/– vs. Nlrc4–/–	-0.201	-0.9064 to 0.5045	No	ns	0.8564
	Day 2
	WT vs. Gsdmd–/–	2.15	1.444 to 2.855	Yes	****	<0.0001
	WT vs. Casp1–/–	2.279	1.574 to 2.985	Yes	****	<0.0001
	WT vs. Nlrc4–/–	2.012	1.306 to 2.717	Yes	****	<0.0001
	Gsdmd–/– vs. Casp1–/–	0.1293	-0.5238 to 0.7824	No	ns	0.945
	Gsdmd–/– vs. Nlrc4–/–	-0.138	-0.7911 to 0.5151	No	ns	0.9343
	Casp1–/– vs. Nlrc4–/–	-0.2673	-0.9205 to 0.3858	No	ns

## Sheet: Figure 2C
Source Data for Figure 2C			**Data from a single mouse is in same location on table. Example: B8 and F8 are Vector and FliCON from a single mouse. C8 and G8 are also paired data from a single mouse.
Same mice as in Figure 2B
Representative of three experiments
N=3-4 mice per genotype per timepoint
	WT
	log(CFU)
Days post infection	Vector				FliCON
1	2.80346	3.10857	2.53403	3.05563	2.24715	1.55226	1.88081	2.04139
2	4.29612	3.83506	4.69064		1.57596	2.51055	2.33846
Statistics
Two-way Repeated Measures ANOVA	Šídák's multiple comparisons test	Predicted (LS) mean diff.	95.00% CI of diff.	Below threshold?	Summary	Adjusted P Value
	Vector - FliCON
Days post infection	1	0.945	0.03660 to 1.853	Yes	*	0.0435
	2	2.132	1.083 to 3.181	Yes	**	0.0027

## Sheet: Figure 2D
Source Data for Figure 2D			**Data from a single mouse is in same location on table. Example: B8 and F8 are Vector and FliCON from a single mouse. C8 and G8 are also paired data from a single mouse.
Same mice as in Figure 2B	* One D1 Nlrc4 mouse was excluded under the "uninfected" criteria-- no colonies on either vector or FliCON plate at harvest
Representative of two experiments
N=3-4 mice per genotype per timepoint
	Nlrc4–/–
	log(CFU)
Days post infection	Vector				FliCON
1	3.25943	3.04218	2.80754		3.35076	2.95999	2.83102
2	4.27211	3.91249	3.85431	4.22703	4.05167	3.72167	4.04857	3.96221
Statistics
Two-way Repeated Measures ANOVA	Šídák's multiple comparisons test	Predicted (LS) mean diff.	95.00% CI of diff.	Below threshold?	Summary	Adjusted P Value
	Vector - FliCON
Days post infection	1	-0.01087	-0.3262 to 0.3045	No	ns	0.9932
	2	0.1205	-0.1526 to 0.3935	No	ns	0.3965

## Sheet: Figure 2E
Source Data for Figure 2E			**Data from a single mouse is in same location on table. Example: B8 and F8 are Vector and FliCON from a single mouse. C8 and G8 are also paired data from a single mouse.
Same mice as in Figure 2B
Representative of two experiments
N=3-4 mice per genotype per timepoint
	Casp1–/–
	log(CFU)
Days post infection	Vector				FliCON
1	3.03743	2.94612	2.73239		3.21352	2.72428	2.85733
2	4.85431	5.8653	5.39358	4.22306	5.01143	5.89163	5.30463	4.19879
Statistics
Two-way Repeated Measures ANOVA	Šídák's multiple comparisons test	Predicted (LS) mean diff.	95.00% CI of diff.	Below threshold?	Summary	Adjusted P Value
	Vector - FliCON
Days post infection	1	-0.02639	-0.3157 to 0.2629	No	ns	0.9539
	2	-0.01756	-0.2681 to 0.2330	No	ns	0.9724

## Sheet: Figure 2F
Source Data for Figure 2F			**Data from a single mouse is in same location on table. Example: B8 and F8 are Vector and FliCON from a single mouse. C8 and G8 are also paired data from a single mouse.
Same mice as in Figure 2B
Representative of three experiments
N=3-4 mice per genotype per timepoint
	Gsdmd–/–
	log(CFU)
Days post infection	Vector				FliCON
1	3.32373	3.05956	3.35965	2.68604	3.74783	2.92993	3.91249	2.68604
2	4.78829	4.36705	4.44716	4.5721	4.66978	4.49369	4.79611	4.80255
Statistics
Two-way Repeated Measures ANOVA	Šídák's multiple comparisons test	Predicted (LS) mean diff.	95.00% CI of diff.	Below threshold?	Summary	Adjusted P Value
	Vector - FliCON
Days post infection	1	-0.2118	-0.6131 to 0.1895	No	ns	0.31
	2	-0.1469	-0.5482 to 0.2544	No	ns	0.5381

## Sheet: Figure 2G
Source Data for Figure 2G
Combined from two independent experiments
N=7-13 mice per genotype per timepoint
48hpi	Competitive Index (Vector/FliCON)
	WT	Il1b/Il18–/–	Casp1/11–/–	Gsdmd–/–
	3.19143	1.64081	0.210169	-0.0716062
	1.64917	1.99868	0.024463	0.0774066
	2.78618	2.62683	0.151539	-0.465079
	2.14338		0.108972
	2.03197	1.77494	0.0951648	-0.0073323
	2.49454	1.71367	0.172505	0.0222764
	2.28628	1.70663	0.0527064	0.0738956
	2.34906	2.4702		-0.0266185
	2.08138	1.2577
	2.27413	1.72874
	2.45421	2.33316
	1.95671	2.33945
	2.28288
Mean +SD	WT	Il1b/Il18–/–	Casp1/11–/–	Gsdmd–/–
Number of values	13	11	7	7
Mean	2.31	1.96	0.117	-0.0567
Std. Deviation	0.385	0.424	0.0661	0.188
Statistics	Dunn's multiple comparisons test	Mean rank diff.	Significant?	Summary	Adjusted P Value	A-?
Kruskal-Wallis	WT vs. Il1b/Il18–/–	4.783	No	ns	>0.9999	B	Il1b/Il18–/–
	WT vs. Casp1/11–/–	25.26	Yes	***	0.0002	D	Casp1/11–/–
	WT vs. Gsdmd–/–	31.12	Yes	****	<0.0001	E	Gsdmd–/–
Normality test
Shapiro-Wilk test
W	0.9498	0.9292	0.9771	0.7151
P value	0.5949	0.4028	0.9444	0.0054
Passed normality test (alpha=0.05)?	Yes	Yes	Yes	No
P value summary	ns	ns	ns	**

## Sheet: Figure 2H
Source Data for Figure 2H			**Data from a single mouse is in same location on table. Example: B8 and Q8 are Vector and FliCON from a single mouse. C8 and R8 are also paired data from a single mouse.
Same mice as in Figure 2G
Combined two independent experiments
N=7-13 mice per genotype per timepoint
48hpi	log(CFU)
Genotype	Vector															FliCON
WT	5.55178	7.18056	7.02733	7.7942			6.86763	6.65045	6.84281	6.59008	6.15901	6.53318	6.33936	6.60873	6.09547	2.30103	5.47207	4.18184	5.59151			4.79146	4.11171	4.51233	4.19682	4.03342	4.21484	3.84094	4.60781	3.76839
Il1b/Il18–/–	7.10837	7.13524	7.54348				7.56981	7.66672	7.75014	7.05432	7.22866	7.07972	7.11296	7.14808		5.40824	5.07725	4.85733				5.75066	5.90884	5.9993	4.53991	5.92675	5.30678	4.7356	4.76443
Casp1/11–/–	6.99856	6.28905	7.09428	7.4208			7.14384	6.88343	6.78845							6.72908	6.20528	6.88343	7.25251			7.00447	6.66672	6.69154
Gsdmd–/–	7.45538	7.27196	4.06942				7.37077	7.32557	7.53664	7.23561						7.46768	7.13524	4.47519				7.3339	7.25909	7.41854	7.21802
Statistics
Two-way Repeated Measures ANOVA	Šídák's multiple comparisons test	Predicted (LS) mean diff.	95.00% CI of diff.	Below threshold?	Summary	Adjusted P Value
	Vector - FliCON
	WT	2.355	2.110 to 2.600	Yes	****	<0.0001
	Il1b/Il18–/–	2.011	1.745 to 2.278	Yes	****	<0.0001
	Casp1/11–/–	0.1693	-0.1646 to 0.5033	No	ns	0.5722
	Gsdmd–/–	-0.006043	-0.3400 to 0.3279	No	ns	>0.9999
