# Supplementary material for: Apoptotic signaling clears engineered Salmonella in an organ-specific manner
Source: eLife. 2023 Dec 6;12:RP89210. doi: 10.7554/eLife.89210 (PMC10699806; doi:10.7554/eLife.89210)
Supplement: Figure 5—figure supplement 1—source data 1. [file elife-89210-fig5-figsupp1-data1.xlsx]

## Sheet: Figure 5- figure supplement 1A
Source Data for Figure 5- figure supplement 1A
representative of three independent experiments
N=5 mice
	innoculum: pWSK229 + pWSK129 + pWSK29
48hpi	Competitive Index (pWSK229/StrainON)
	comparisons are from the same mouse
	pWSK129	pWSK29
	0.124192	0.067455
	0.216507	0.107826
	-0.313619	0.0511525
	-0.235193	-0.0532455
	-0.382077	-0.503381
Mean +SD	pWSK129	pWSK29
Number of values	5	5
Mean	-0.118	-0.066
Std. Deviation	0.27	0.252
Statistics
Unpaired t test
P value	0.7609
P value summary	ns
Significantly different (P < 0.05)?	No
One- or two-tailed P value?	Two-tailed
t, df	t=0.3149, df=8

## Sheet: Figure 5- figure supplement 1B
Source Data for Figure 5- figure supplement 1B			**Data from a single mouse is in the same row
Same mice as in Figure 5- figure supplement 1A
representative of three independent experiments
N=5 mice
48hpi
	innoculum: pWSK229 + pWSK129 + pWSK29
48hpi	log(CFU)
	pWSK229	pWSK129	pWSK29
	4.237	4.07219	4.04461
	4.2324	3.97528	3.99964
	3.63548	3.90849	3.45939
	3.90991	4.10449	3.83822
	3.86402	4.20548	4.24246
Statistics
repeated measure one-way ANOVA	Tukey's multiple comparisons test	Mean Diff.	95.00% CI of diff.	Below threshold?	Summary	Adjusted P Value
	pWSK229 vs. pWSK129	-0.07742	-0.5083 to 0.3534	No	ns	0.8074	A-B	FliCON
	pWSK229 vs. pWSK29	0.0589	-0.3421 to 0.4599	No	ns	0.8646	A-C	BIDON
	pWSK129 vs. pWSK29	0.1363	-0.2040 to 0.4767	No	ns	0.4112	B-C
