# Supplementary material for: Apoptotic signaling clears engineered Salmonella in an organ-specific manner
Source: eLife. 2023 Dec 6;12:RP89210. doi: 10.7554/eLife.89210 (PMC10699806; doi:10.7554/eLife.89210)
Supplement: Figure 5—source data 1. [file elife-89210-fig5-data1.xlsx]

## Sheet: Figure 5A
Source Data for Figure 5A
Combined from 3 independent experiments
N=13-14 mice per condition
*one D2 BIDON and one D1 FliCON were excluded in one experiment due to "uninfected" criteria-- no colonies on either vector or Strain ON plate at harvest. No mice excluded for the other two replicates
	Competitive index (Vector/StrainON)
Days post infection	BIDON															FliCON
1	-0.0279867	0.351271	-0.101027	-0.0300697	-0.493827	0.0184834	0.257125	1.14613	-0.0274382	-0.847712	-0.836065	-0.851172	-1.1641	-1.43475		0.166811	0.495763	0.650665	0.592673	0.729847	1.30213	0.772619	0.622463	0.658675	0.393623	0.46057		0.731376	0.356727
2	0.730646	-0.0109534	0.214228	0.227098	0.585354	0.687975	0.468073	0.29727	-0.0255541	-0.528953		-0.661018	-0.398018	-0.556391		1.51597	1.87597	2.508	0.120487	2.45685	2.55262	2.06945	1.81502	1.85649	1.72843	2.0363	2.1746	2.18436	1.34149
Mean + SD from Prism 9.5.1
Days post infection	BIDON			FliCON
	Mean	SD	N	Mean	SD	N
1	-0.288653	0.687763	14	0.610303	0.271081	13
2	0.079212	0.488079	13	1.874	0.617997	14
Statistics
2-way ANOVA	Šídák's multiple comparisons test	Predicted (LS) mean diff.	95.00% CI of diff.	Below threshold?	Summary	Adjusted P Value
	BIDON - FliCON
Days post infection	1	-0.899	-1.418 to -0.3803	Yes	***	0.0003
	2	-1.795	-2.313 to -1.276	Yes	****	<0.0001

## Sheet: Figure 5B
Source Data for Figure 5B			**Data from a single mouse is in same location on table. Example: B8 and Q8 are Vector and FliCON from a single mouse. C8 and R8 are also paired data from a single mouse.
Same mice as in Figure 5A
Combined from 3 independent experiments
N=13-14 mice per condition
*one D2 BIDON and one D1 FliCON were excluded in one experiment due to "uninfected" criteria-- no colonies on either vector or Strain ON plate at harvest. No mice excluded for the other two replicates	WT
	log(CFU)
Group	Vector															Strain ON
FliCON 24hpi	3.38214	2.40937	2.95424	3.12764	2.33445	3.20376	2.67821	2.91803	3.25928	4.20817	3.56891		3.1403	4.20669		3.16702	1.8653	2.25527	2.48667	1.5563	1.86134	1.8653	2.25527	2.56031	3.82282	3.11661		2.41719	3.85824
BIDON 24hpi	2.84696	2.70243	2.88649	2.94841	1.56427	3.4216	3.23637	2.70643	3.21094	2.71433	2.6899	2.26717	2.17026	2.18184		2.98318	2.45939	3.09575	3.08672	2.16633	3.40312	2.97924	1.56031	3.23838	3.66511	3.62904	3.22141	3.43743	3.71966
FliCON 48hpi	3.91452	3.48855	4.11261	4.04578	4.06942	4.62634	4.25588	4.60351	4.575	3.89042	4.07335	4.21941	4.22141	4.02694		2.35025	1.56427	1.5563	3.87699	1.56427	2.03342	2.14613	2.74819	2.67821	2.17026	2.04532	2.05308	2.04532	2.69373
BIDON 48hpi	4.17835	3.31218	4.46697	3.72049	4.94052	4.45637	4.71809	5.01894	3.76975	4.01925		3.39678	3.93534	3.52409		3.55594	3.43136	4.36097	3.60163	4.4634	3.76839	4.25001	4.72167	3.7953	4.65128		4.16087	4.43643	4.18355
Statistics
Two-way Repeated Measures ANOVA	Šídák's multiple comparisons test	Predicted (LS) mean diff.	95.00% CI of diff.	Below threshold?	Summary	Adjusted P Value
	Vector - StrainON
Infection Group	FliCON24h	0.6387	0.2374 to 1.040	Yes	***	0.0006
	BIDON 24h	-0.3641	-0.7508 to 0.02261	No	ns	0.0724
	FliCON48h	1.9	1.513 to 2.287	Yes	****	<0.0001
	BIDON 48h	0.00587	-0.3955 to 0.4072	No	ns	>0.9999

## Sheet: Figure 5C
Source Data for Figure 5C
Combined from three independent experiments
N=10-12 mice per condition
48hpi	Competitive Index (Vector/StrainON)
	FliCON		BIDON
	WT	Gsdmd–/–	WT
	2.55013	-0.0118355	0.0202034
	2.3947	0.170487	-0.0942209
	1.84207	0.205249	0.234083
	2.78488	0.597364	-0.181732
	0.748828	0.0773145	-0.103219
	2.67094	0.347635	0.0854302
	2.27814	0.42194	0.272385
	1.31616	-0.262647	-0.117268
	0.825678	-1.64995	0.400052
	2.25838	0.342308	-0.0951338
	2.37743		-0.187809
	1.26501		0.0190315
	FliCON		BIDON
Mean +SD	WT	Gsdmd–/–	WT
Number of values	12	10	12
Mean	1.94	0.0238	0.021
Std. Deviation	0.723	0.636	0.191
Statistics	Tukey's multiple comparisons test	Mean Diff.	95.00% CI of diff.	Below threshold?	Summary	Adjusted P Value
Ordinary One-way ANOVA	WT vs. Gsdmd–/–	1.919	1.327 to 2.511	Yes	****	<0.0001	A-B
	WT vs. WT	1.922	1.357 to 2.486	Yes	****	<0.0001	A-C
	Gsdmd–/– vs. WT	0.002803	-0.5893 to 0.5949	No	ns	>0.9999	B-C

## Sheet: Figure 5D
Source Data for Figure 5D			**Data from a single mouse is in same location on table. Example: B8 and N8 are Vector and FliCON from a single mouse. C8 and O8 are also paired data from a single mouse.
Same mice as in Figure 5C
Combined from three independent experiments
N=10-12 mice per condition
48hpi	log(CFU)
Group	Vector												Strain ON
FliCON in WT	4.02612	4.49624	4.28421	4.38501	4.10862	4.58358	5.20049	3.55194	3.4216	4.38887	4.01515	3.91062	1.5563	2.18184	2.52244	1.5721	3.33176	1.88461	2.89432	2.15836	2.51851	2.05308	1.56031	2.5682
FliCON in Gsdmd–/–	5.40154	5.87313	4.89469	4.78295	4.78295	4.24097	4.4456	5.34879	4.94101	4.95279			5.49369	5.78295	4.76975	4.15756	4.67761	3.8653	3.99564	5.53403	6.51355	4.53307
BIDON in WT	4.48855	4.30449	4.3277	4.28735	4.58668	4.18752	4.22324	4.10744	4.22141	4.50231	4.1338	4.20669	4.4014	4.33176	4.02667	4.46909	4.6899	4.10209	3.95085	4.23872	3.83537	4.61146	4.33563	4.20167
Statistics
Two-way Repeated Measures ANOVA	Šídák's multiple comparisons test	Predicted (LS) mean diff.	95.00% CI of diff.	Below threshold?	Summary	Adjusted P Value
	Vector - StrainON
FliCON	WT	1.964	1.565 to 2.363	Yes	****	<0.0001
	GsdmD-/-	0.03413	-0.4031 to 0.4713	No	ns	0.9963
BIDON	WT	0.03188	-0.3672 to 0.4310	No	ns	0.996

## Sheet: Figure 5F
Source Data for Figure 5F
Combined from three independent experiments
N=15 mice
	innoculum: pWSK229 (vector) + KanR FliC ON + BID ON
48hpi	Competitive Index (Vector/StrainON)
	comparisons are from the same mouse
	FliCON	BIDON
	2.16981	0.0220844
	1.70334	0.110474
	2.5056	0.415338
	2.00393	0.360127
	2.33493	0.56901
	2.3634	0.17962
	2.14348	0.19202
	2.04858	-0.0730507
	2.33537	-0.130956
	2.76203	0.248501
	2.19807	-0.0329858
	2.21985	-0.206893
	2.08857	-0.107723
	2.04139	-0.162081
	2.34948	0.516368
Mean +SD	FliC ON	BID ON
Number of values	15	15
Mean	2.22	0.127
Std. Deviation	0.245	0.254
Statistics
Unpaired t test
P value	<0.0001
P value summary	****
Significantly different (P < 0.05)?	Yes
One- or two-tailed P value?	Two-tailed
t, df	t=22.97, df=28

## Sheet: Figure 5G
Source Data for Figure 5G			**Data from a single mouse is in the same row
Same mice as in Figure 5F
Combined from three independent experiments
N=15 mice
48hpi
	innoculum: pWSK229 (vector) + KanR FliC ON + BID ON
48hpi	log(CFU)
	Vector	FliCON	BIDON
	3.819	1.57596	3.86599
	4.69861	2.92203	4.65722
	4.92125	2.34242	4.575
	4.59961	2.52244	4.30856
	5.29465	2.88649	4.79472
	4.727	2.22185	4.39794
	5.35218	3.06695	5.01072
	4.41218	2.22185	4.33579
	5	2.52288	4.98152
	6.01773	3.11394	5.61979
	4.51021	2.17026	4.38112
	3.92203	1.56031	3.96685
	4.09968	1.86923	4.04532
	4.03656	1.85329	4.03656
	4.05167	1.56031	3.37322
Statistics
repeated measure one-way ANOVA	Dunnett's multiple comparisons test	Mean Diff.	95.00% CI of diff.	Below threshold?	Summary	Adjusted P Value	A-?
	Vector vs. FliCON	2.337	2.175 to 2.498	Yes	****	<0.0001	B	FliCON
	Vector vs. BIDON	0.2075	0.06723 to 0.3477	Yes	**	0.0051	C	BIDON
