# Supplementary material for: Apoptotic signaling clears engineered Salmonella in an organ-specific manner
Source: eLife. 2023 Dec 6;12:RP89210. doi: 10.7554/eLife.89210 (PMC10699806; doi:10.7554/eLife.89210)
Supplement: Figure 6—source data 1. [file elife-89210-fig6-data1.xlsx]

## Sheet: Figure 6A
Source Data for Figure 6A
Combined from two independent experiments
N= 6 mice per genotype
48hpi	Competitive Index (Vector/FliCON)
	Casp1fl/fl	Casp1fl/flLysM-cre	Casp1fl/flMrp8-cre
	1.08058	0.6721	1.24988
	1.96658	0.31362	2.3827
	1.78252	0.51055	2.04576
	3.0607	0.4017	1.96166
	1.73909	0.44755	2.40302
	2.35218	0.35416	2.22589
Mean +SD	Casp1fl/fl	Casp1fl/flLysM-cre	Casp1fl/flMrp8-cre
Number of values	6	6	6
Mean	2	0.45	2.04
Std. Deviation	0.665	0.129	0.428
Statistics	Dunnett's multiple comparisons test	Mean Diff.	95.00% CI of diff.	Below threshold?	Summary	Adjusted P Value	A-?
Ordinary One-way ANOVA	Casp1fl/fl vs. Casp1fl/flLysM-cre	1.547	0.8957 to 2.198	Yes	****	<0.0001	B	Casp1fl/flLysM-cre
	Casp1fl/fl vs. Casp1fl/flMrp8-cre	-0.04788	-0.6992 to 0.6034	No	ns	0.9767	C	Casp1fl/flMrp8-cre

## Sheet: Figure 6B
Source Data for Figure 6B			**Data from a single mouse is in same location on table. Example: B8 and H8 are Vector and FliCON from a single mouse. C8 and I8 are also paired data from a single mouse.
Same mice as in Figure 6A
Combined from two independent experiments
N= 6 mice per genotype
48hpi	log(CFU)
Group	Vector						FliCON
Casp1fl/fl	6.54777	5.8451	5.77452	6.83506	5.68124	6.35603	5.46835	3.87852	3.99211	3.77452	3.9425	4.00432
Casp1fl/flLysM-cre	5.41664	5.29226	5.35603	5.69897	6.09342	5.66464	4.74429	4.97864	4.8451	5.29667	5.64738	5.30963
Casp1fl/flMrp8-cre	5.10721	6.5977	5.74819	6.26482	5.37475	6.70672	3.85854	4.21484	3.70243	4.3032	2.97081	4.48001
Statistics
Two-way Repeated Measures ANOVA	Šídák's multiple comparisons test	Mean Diff.	95.00% CI of diff.	Below threshold?	Summary	Adjusted P Value
	Vector - FliCON
	Casp1fl/fl	1.997	1.489 to 2.504	Yes	****	<0.0001
	Casp1fl/flLysM-cre	0.45	-0.05730 to 0.9574	No	ns	0.0898
	Casp1fl/flMrp8-cre	2.045	1.538 to 2.552	Yes	****	<0.0001
