# Supplementary material for: Apoptotic signaling clears engineered Salmonella in an organ-specific manner
Source: eLife. 2023 Dec 6;12:RP89210. doi: 10.7554/eLife.89210 (PMC10699806; doi:10.7554/eLife.89210)
Supplement: Figure 7—figure supplement 1—source data 1. [file elife-89210-fig7-figsupp1-data1.xlsx]

## Sheet: Figure 7- figure supplement 1A
Source Data for Figure 7- figure supplement 1A
Data from one independent experiment
N=3-5 mice per genotype
	Competitive index (Vector/FliCON)
48 hpi		WT						Nlrc4–/–						Casp1–/–						Gsdmd–/–
organ	cecum	3.0086	2.73469	2.76176	3.16435	2.6596		0.133057	-0.0634863	0.148004				0.28679	0.430125	1.8653	1.84984	0.209384		3.40654	2.97445	2.51364	3.41497	3.50515
	MLN	0.748188	1.59476	1.39445	1.07918	0.563142		0.146128	-0.0923143	0.366847				0.00496342	-0.28097	0.12088	0.020122	0.111366		0.565337	-0.154902	-0.163857	0.0714944	0.272385
	fecal	-0.214296	-0.0647253	-0.345552	-0.370788	-0.254033		0.0791812	-0.252798	-0.201645				0.273001	-0.00459575	0.271741	0.0199711	-0.00476379		-0.158567	-0.159058	-0.0411548	-0.035392	0.490086
		WT			Nlrc4–/–			Casp1–/–			Gsdmd–/–
		Mean	SD	N	Mean	SD	N	Mean	SD	N	Mean	SD	N
organ	cecum	2.8658	0.212167	5	0.0725248	0.118026	3	0.928289	0.852023	5	3.16295	0.41746	5
	MLN	1.07594	0.430412	5	0.14022	0.229638	3	-0.0047278	0.163	5	0.118092	0.308232	5
	fecal	-0.249879	0.121797	5	-0.125087	0.178741	3	0.111071	0.147591	5	0.0191829	0.270062	5
Statistics
Two-way repeated measures ANOVA	Šídák's multiple comparisons test	Predicted (LS) mean diff.	95.00% CI of diff.	Below threshold?	Summary	Adjusted P Value
	cecum
	WT vs. Nlrc4–/–	2.793	2.054 to 3.532	Yes	****	<0.0001
	WT vs. Casp1–/–	1.938	1.297 to 2.578	Yes	****	<0.0001
	WT vs. Gsdmd–/–	-0.2971	-0.9372 to 0.3429	No	ns	0.7513
	Nlrc4–/– vs. Casp1–/–	-0.8558	-1.595 to -0.1167	Yes	*	0.0157
	Nlrc4–/– vs. Gsdmd–/–	-3.09	-3.830 to -2.351	Yes	****	<0.0001
	Casp1–/– vs. Gsdmd–/–	-2.235	-2.875 to -1.595	Yes	****	<0.0001
	MLN
	WT vs. Nlrc4–/–	0.9357	0.1966 to 1.675	Yes	**	0.0068
	WT vs. Casp1–/–	1.081	0.4406 to 1.721	Yes	***	0.0002
	WT vs. Gsdmd–/–	0.9579	0.3178 to 1.598	Yes	**	0.001
	Nlrc4–/– vs. Casp1–/–	0.1449	-0.5941 to 0.8840	No	ns	0.9953
	Nlrc4–/– vs. Gsdmd–/–	0.02213	-0.7169 to 0.7612	No	ns	>0.9999
	Casp1–/– vs. Gsdmd–/–	-0.1228	-0.7629 to 0.5172	No	ns	0.9958
	fecal
	WT vs. Nlrc4–/–	-0.1248	-0.8639 to 0.6143	No	ns	0.9979
	WT vs. Casp1–/–	-0.3609	-1.001 to 0.2791	No	ns	0.5573
	WT vs. Gsdmd–/–	-0.2691	-0.9091 to 0.3710	No	ns	0.8254
	Nlrc4–/– vs. Casp1–/–	-0.2362	-0.9752 to 0.5029	No	ns	0.9447
	Nlrc4–/– vs. Gsdmd–/–	-0.1443	-0.8833 to 0.5948	No	ns	0.9954
	Casp1–/– vs. Gsdmd–/–	0.09189	-0.5482 to 0.7319	No	ns

## Sheet: Figure 7- figure supplement 1B
Source Data for Figure 7- figure supplement 1B
Same mice as Figure 7- figure supplement 1A
Data from one independent experiment
N=3-5 mice per genotype
			log(CFU)
	Organ	Mouse Genotype	Vector						FliCON
	Cecum	WT	4.7253	5.29299	5.43616	4.86693	5.15096		1.61979	2.4614	2.57749	1.60566	2.39445
		Gsdmd–/–	5.43795	5.51851	5.51255	5.443	5.23215		1.9345	2.44716	2.902	1.93112	1.63009
		Casp1–/–	5.91645	5.28113	4.56318	4.66994	5.6692		5.53275	4.75409	2.60097	2.72318	5.36291
		Nlrc4–/–	5.6744	5.45255	5.48013				5.44444	5.41913	5.23521
	MLN	WT	3.15045	4.01389	3.02284	3.31387	3.03663		2.30535	2.32222	1.53148	2.13778	2.37658
		Gsdmd–/–	4.47349	3.92488	3.8704	4.16316	4.28855		3.81124	3.98287	3.93735	3.99476	3.91925
		Casp1–/–	4.27184	3.57749	4.08594	4.32997	4.74135		4.16997	3.76155	3.86815	4.21294	4.53307
		Nlrc4–/–	4.26007	4.20389	4.43029				4.01703	4.1993	3.96653
	Fecal	WT	7.1877	7.03834	7.54908	6.56563	6.93921		7.30508	7.00615	7.79772	6.8395	7.09633
		Gsdmd–/–	7.51693	6.61739	7.66108	7.47036	7.27756		7.57859	6.67954	7.60533	7.40884	6.69057
		Casp1–/–	6.90139	7.01616	7.39549	6.28518	6.86307		6.53148	6.92385	7.02684	6.1683	6.77093
		Nlrc4–/–	7.60746	6.98752	7.2564				7.43136	7.14341	7.36114
Statistics
Repeated measure two-way ANOVA		Šídák's multiple comparisons test	Predicted (LS) mean diff.	95.00% CI of diff.	Below threshold?	Summary	Adjusted P Value
		Vector - FliCON
	Organ	Mouse Genotype
	Cecum	WT	2.963	2.467 to 3.458	Yes	****	<0.0001
		Gsdmd–/–	3.26	2.764 to 3.755	Yes	****	<0.0001
		Casp1–/–	1.025	0.5298 to 1.521	Yes	****	<0.0001
		Nlrc4–/–	0.1694	-0.4701 to 0.8090	No	ns	0.9988
	MLN	WT	1.173	0.6774 to 1.668	Yes	****	<0.0001
		Gsdmd–/–	0.215	-0.2804 to 0.7104	No	ns	0.9279
		Casp1–/–	0.09218	-0.4032 to 0.5876	No	ns	>0.9999
		Nlrc4–/–	0.2371	-0.4024 to 0.8767	No	ns	0.9767
	Fecal	WT	-0.153	-0.6484 to 0.3424	No	ns	0.9949
		Gsdmd–/–	0.1161	-0.3793 to 0.6115	No	ns	0.9996
		Casp1–/–	0.208	-0.2874 to 0.7034	No	ns	0.9423
		Nlrc4–/–	-0.02818	-0.6677 to 0.6114	No	ns	>0.9999

## Sheet: Figure 7- figure supplement 1C
Source Data for Figure 7- figure supplement 1A
Data combined from two independent experiments
N= 10 mice
		Competitive index(SspH1SS-HA/BIDON)
48 hpi		WT mice
		-0.733598
		-0.590166
		-0.666934
		-0.571534
		0.121031
		-0.637388
		-0.543617
		-0.339928
		-0.274772
		-0.165479
Mean +SD
Number of values		10
Mean		-0.44
Std. Deviation		0.27

## Sheet: Figure 7- figure supplement 1D
Source Data for Figure 7- figure supplement 1D			**Data from a single mouse is in the same row
Same mice as in Figure 7- figure supplement 1C
Data combined from two independent experiments
N= 10 mice
48hpi	log(CFU)
	BIDON	SspH1SS-HA
	4.01515	3.25928
	5.05805	4.4456
	3.19572	2.50651
	4.1186	3.52479
	3.2284	3.32715
	4.07335	3.54593
	4.84303	4.40937
	3.82347	3.59351
	5.93597	5.77116
	5.75413	5.69861
Statistics
Paired t test
P value	0.002
P value summary	**
Significantly different (P < 0.05)?	Yes
One- or two-tailed P value?	Two-tailed
t, df	t=4.308, df=9
Number of pairs	10
