# Supplementary material for: Apoptotic signaling clears engineered Salmonella in an organ-specific manner
Source: eLife. 2023 Dec 6;12:RP89210. doi: 10.7554/eLife.89210 (PMC10699806; doi:10.7554/eLife.89210)
Supplement: Figure 7—source data 1. [file elife-89210-fig7-data1.xlsx]

## Sheet: Figure 7A
Source Data for Figure 7A
Combined from two (cecum, fecal) or one (MLN) independent experiments (spleen was harvested for first experiment but had negligible burdens, one additional rep of MLN data shown in Figure 7- figure supplement 1A-B)
N=10 (cecum, fecal) or 5 (MLN) mice
	Competitive index (Vector/StrainON)
48 hpi		WT pWSK29										WT FliCON										Gsdmd–/– FliCON
organ	cecum	0.445522	0.413338	0.219557	0.211439	0.19885	0.23419	0.401282	0.618766	0.274767	0.377321	2.97342	2.65522	2.4014	3.48608	2.76319	3.16797	2.89177	3.32934	2.85435	2.56854	3.06422	3.20525	2.20327	2.55234	2.9834	2.29793	2.84826	2.55615	2.91525	2.82274
	MLN	-0.457568	0.161526	0.413084	-0.00163576	0.129252						1.81513	1.55831	1.66901	1.19189	1.35698						-0.0104097	0.447158	0.313619	0.229465	0.644969
	fecal	-0.00811789	0.181215	0.00861355	0.10902	0.0908074	0.0407439	-0.0325123	0.0892564	0.150454	0.021613	-0.11009	-0.194773	0.0125891	-0.279841	-0.268845	0.05258	0.0638848	0.0849991	0.06192	0.14417	0.064458	0.165433	-0.0823513	0.0949755	0.191886	0.0393489	0.15484	-0.493208	0.186967	0.45428
		WT pWSK29			WT FliCON			Gsdmd–/– FliCON
		Mean	SD	N	Mean	SD	N	Mean	SD	N
organ	cecum	0.339503	0.13572	10	2.90913	0.340496	10	2.74488	0.330383	10
	MLN	0.0489318	0.320482	5	1.51826	0.247484	5	0.32496	0.244468	5
	fecal	0.0651093	0.0703211	10	-0.0433406	0.156599	10	0.077663	0.24357	10
Statistics
Two-way repeated measures ANOVA (mixed effects model REML)	Šídák's multiple comparisons test	Predicted (LS) mean diff.	95.00% CI of diff.	Below threshold?	Summary	Adjusted P Value
	cecum
	WT pWSK29 vs. WT FliCON	-2.57	-2.835 to -2.304	Yes	****	<0.0001
	WT pWSK29 vs. Gsdmd–/– FliCON	-2.405	-2.671 to -2.140	Yes	****	<0.0001
	WT FliCON vs. Gsdmd–/– FliCON	0.1642	-0.1016 to 0.4301	No	ns	0.3526
	MLN
	WT pWSK29 vs. WT FliCON	-1.476	-1.851 to -1.100	Yes	****	<0.0001
	WT pWSK29 vs. Gsdmd–/– FliCON	-0.2719	-0.6475 to 0.1037	No	ns	0.2233
	WT FliCON vs. Gsdmd–/– FliCON	1.204	0.8282 to 1.579	Yes	****	<0.0001
	fecal
	WT pWSK29 vs. WT FliCON	0.1084	-0.1574 to 0.3743	No	ns	0.6873
	WT pWSK29 vs. Gsdmd–/– FliCON	-0.01255	-0.2784 to 0.2533	No	ns	0.9992
	WT FliCON vs. Gsdmd–/– FliCON	-0.121	-0.3868 to 0.1448	No	ns	0.6091

## Sheet: Figure 7B
Source Data for Figure 7B
Same mice as Figure 7A
Combined from two (cecum, fecal) or one (MLN) independent experiments (spleen was harvested for first experiment but had negligible burdens, one additional rep of MLN data shown in Figure 7- figure supplement 1A-B)
N=10 (cecum, fecal) or 5 (MLN) mice
				log(CFU)
	Organ	Strain ON	Mouse Genotype	Vector										StrainON
	Cecum	pWSK29	WT	5.03476	5.33579	5.41913	4.97004	5.15127	5.23172	5.51233	4.86094	5.09691	4.89927	4.73373	5.06695	5.34406	4.90309	5.09691	5.01424	5.12775	4.25888	4.83885	4.53866
		FliCON	WT	5.55429	5.41218	4.77815	5.46489	5.34406	5.49136	5.67783	5.466	5.24117	5.63578	2.42597	2.60206	2.22185	1.82391	2.42597	2.39445	2.85713	2.20772	2.45788	3.1383
			Gsdmd–/–	5.34406	5.83727	5.48311	5.34406	5.50628	5.47312	5.67225	5.52569	5.69788	5.85228	2.12494	2.47712	3.12494	2.63682	2.36798	3.24625	2.89505	3.0406	2.8537	3.1006
	MLN	pWSK29	WT	1.5272	3.65801	3.91204	3.72428	3.68604						2.12926	3.64098	3.64345	3.8704	3.70128
		FliCON	WT	3.97864	3.72605	3.84094	3.83675	3.95069						2.0086	2.01284	2.01703	2.48996	2.43881
			Gsdmd–/–	4.25999	4.50243	4.23045	4.03403	3.44953						4.1155	3.90037	3.76193	3.64966	2.64966
	Fecal	pWSK29	WT	7.32991	7.31021	7.42808	7.41818	7.31352	7.85595	7.62114	7.0476	7.66108	7.69547	7.48252	7.27348	7.56396	7.45365	7.3672	7.83191	7.67036	6.97505	7.52733	7.69057
		FliCON	WT	7.43711	7.44974	7.43686	7.21085	7.53228	7.70987	7.55555	7.71973	7.42622	7.60138	7.39229	7.48961	7.26937	7.33579	7.64622	7.72835	7.56273	7.70579	7.43537	7.52827
			Gsdmd–/–	5.38754	5.29538	7.14027	6.70757	4.84094	7.55743	8.22076	7.96761	7.80341	7.01415	5.16818	4.97505	7.06772	6.45769	4.49415	7.58915	8.13698	8.53188	7.68751	6.63094
Statistics
Repeated measure two-way ANOVA			Šídák's multiple comparisons test	Predicted (LS) mean diff.	95.00% CI of diff.	Below threshold?	Summary	Adjusted P Value
			Vector - StrainON
	Organ	Strain ON	Mouse Genotype
	Cecum	pWSK29	WT	0.2589	0.02912 to 0.4887	Yes	*	0.0177
		FliCON	WT	2.951	2.721 to 3.181	Yes	****	<0.0001
			Gsdmd–/–	2.787	2.557 to 3.017	Yes	****	<0.0001
	MLN	pWSK29	WT	-0.09556	-0.4205 to 0.2294	No	ns	0.9904
		FliCON	WT	1.673	1.348 to 1.998	Yes	****	<0.0001
			Gsdmd–/–	0.4799	0.1549 to 0.8048	Yes	***	0.0007
	Fecal	pWSK29	WT	-0.01549	-0.2453 to 0.2143	No	ns	>0.9999
		FliCON	WT	-0.001421	-0.2312 to 0.2284	No	ns	>0.9999
			Gsdmd–/–	0.1196	-0.1102 to 0.3494	No	ns	0.7469

## Sheet: Figure 7C
Source Data for Figure 7C
Combined from two independent experiments
N=10 mice
	Competitive index (Vector/StrainON)
48 hpi		SspH1SS-HA										BIDON
organ	cecum	0.459077	0.930803	0.566104	0.828372	0.370941	0.355223	1.56437	0.348068	1.80539	0.355884	1.63718	1.66446	1.88645	0.559862	1.92977	2.16589	1.63776	2.22388	2.16725	2.33934
	MLN	-0.0180445	0.316154	0.261796	0.0424362	0.372209	0.497421	-0.0892146	-0.426739	0.134445	0.0573982	-0.860354	-1.30937	-0.657188	-0.863162	-0.920955	-0.472595	-0.522569	-0.413108	-0.421509	-0.505896
	fecal	-0.17107	0.0322606	-0.0273845	-0.000739644	-0.225779	-0.228568	-0.383	-0.259956	-0.543972	-0.251977	-0.578905	-0.655737	-0.24364	-0.698764	-0.551504	-0.156477	-0.396685	-0.287822	-0.760471	-0.661841
		SspH1SS-HA			BIDON
		Mean	SD	N	Mean	SD	N
organ	cecum	0.758423	0.532293	10	1.82118	0.512973	10
	MLN	0.114786	0.265886	10	-0.694671	0.289592	10
	fecal	-0.206019	0.177483	10	-0.499185	0.212418	10
Statistics
Two-way repeated measures ANOVA (mixed effects model REML)	Šídák's multiple comparisons test	Mean Diff.	95.00% CI of diff.	Below threshold?	Summary	Adjusted P Value
	SspH1-HA - BIDON
	cecum	-1.063	-1.459 to -0.6660	Yes	****	<0.0001
	MLN	0.8095	0.4127 to 1.206	Yes	****	<0.0001
	fecal	0.2932	-0.1036 to 0.6899	No	ns	0.2064

## Sheet: Figure 7D
Source Data for Figure 7D
Same mice as Figure 7C
Combined from two independent experiments
N=10 mice
			log(CFU)
	Organ	StrainON	Vector										StrainON
	Cecum	SspH1SS-HA	5.5195	4.76343	5.30338	5.00988	4.96848	5.35579	4.88286	5.33962	4.93952	5.38179	5.16732	3.93952	4.84417	4.2884	4.70444	4.8487	3.16663	4.83969	2.98227	4.87405
		BIDON	4.82715	4.75948	5.0564	5.21836	5.17246	5.22821	5.02979	5.44651	5.31175	5.31893	3.14778	3.05282	3.12775	4.6163	3.20049	2.993	3.3227	3.15331	3.07518	2.91027
	MLN	SspH1SS-HA	5.14262	3.35971	3.38917	3.40226	3.07978	3.76567	4.06496	4.12537	3.70544	3.36822	5.26756	3.15045	3.23426	3.46672	2.81447	3.45667	3.46075	3.69285	3.79099	3.46598
		BIDON	3.11126	2.52288	3.48192	3.09968	3.12678	3.11639	4.00231	4.40025	3.41913	3.15897	3.92942	3.79005	4.09691	3.92064	4.00554	3.85994	3.91399	4.03663	4.14317	3.90255
	Fecal	SspH1SS-HA	7.50543	7.53148	7.56839	7.23469	6.96083	6.97924	6.60296	7.39229	6.90139	7.14806	7.7834	7.60611	7.70266	7.34232	7.2935	7.05595	6.8341	7.50039	7.2935	7.24818
		BIDON	5.15987	6.09633	7.52322	7.37136	6.85183	5.07234	6.54407	7.14451	5.38081	7.40884	5.69657	6.70987	7.72466	8.02792	7.36114	5.15949	6.87143	7.363	6.07196	8.00136
Statistics
Repeated measure two-way ANOVA		Šídák's multiple comparisons test	Mean Diff.	95.00% CI of diff.	Below threshold?	Summary	Adjusted P Value
		Vector - StrainON
	Organ	StrainON
	Cecum	SspH1-HA	0.7809	0.4347 to 1.127	Yes	****	<0.0001
		BIDON	1.877	1.531 to 2.223	Yes	****	<0.0001
	MLN	SspH1-HA	0.1603	-0.1859 to 0.5064	No	ns	0.7599
		BIDON	-0.6159	-0.9621 to -0.2697	Yes	****	<0.0001
	Fecal	SspH1-HA	-0.1835	-0.5297 to 0.1627	No	ns	0.6319
		BIDON	-0.4434	-0.7896 to -0.09723	Yes	**	0.0057
